# Supplementary material for: PD-1 and Tim-3 Pathways Regulate CD8+ T Cells Function in Atherosclerosis
Source: PubMed Central journal article supplement (PMC4452700; doi:10.1371/journal.pone.0128523), 2015-06-02

Figure S2

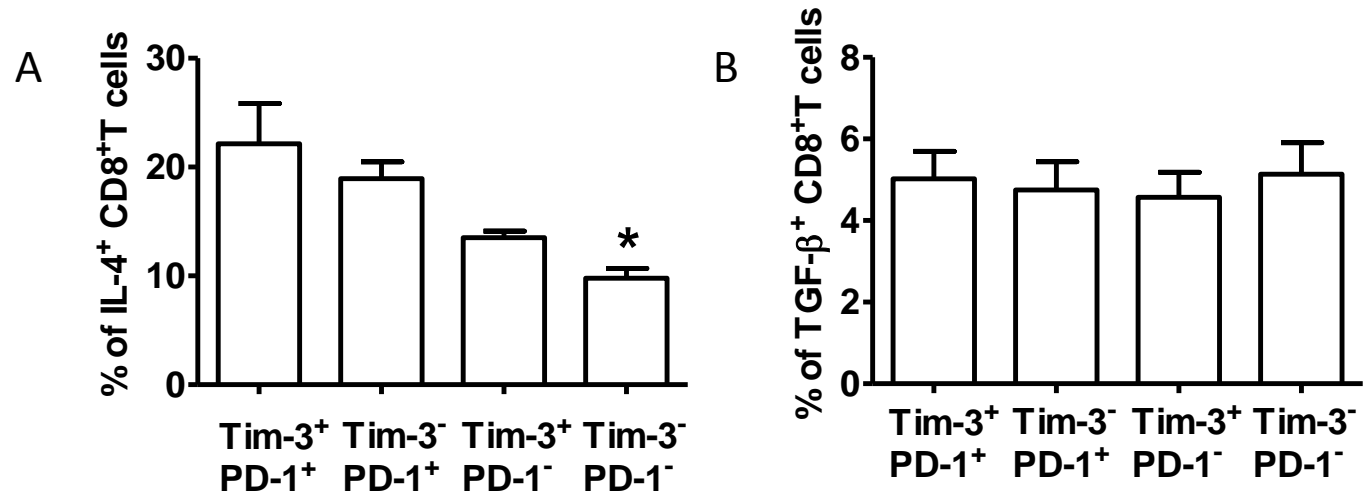

Supplement: pone.0128523.s002.pdf [file pone.0128523.s002.pdf]
